# Supplementary material for: Aqueous phase synthesis of copper nanoparticles: a link between heavy metal resistance and nanoparticle synthesis ability in bacterial systems
Source: Royal Society of Chemistry journal article supplement (doi:10.1039/c2nr32887a), 2012-11-22
Supplement: c2nr32887a.pdf [file c2nr32887a.pdf]

## Supplementary Information

for

# Aqueous phase synthesis of copper nanoparticles: A link between heavy metal resistance and nanoparticle synthesis ability in bacterial systems

*Rajesh Ramanathan,<sup>a,b,c</sup> Matthew R. Field,<sup>c</sup> Anthony P. O'Mullane,<sup>c</sup> Peter M. Smooker,<sup>c</sup> Suresh K.*

*Bhargava<sup>b,c</sup> and Vipul Bansal<sup>a,b,c,\*</sup>*

<sup>a</sup>NanoBiotechnology Research Laboratory (NBRL), <sup>b</sup>Centre for Advanced Materials and Industrial Chemistry (CAMIC), <sup>c</sup>School of Applied Sciences, RMIT University, GPO Box 2476V, Melbourne VIC 3001, Australia

Fax: +61 3 99252882; Tel: +61 3 99252121 ; \*E-mail: vipul.bansal@rmit.edu.au

|                                 |                                                               |     |
|---------------------------------|---------------------------------------------------------------|-----|
| SilA <i>Morganella morganii</i> | MIEWIIRRSVANRFLVMMGALFLSIWGTWTIINTPVDALPDLSDVQVIK             | 50  |
| CusA <i>Escherichia coli</i>    | MIEWIIRRSVANRFLVLMGALFLSIWGTWTIINTPVDALPDLSDVQVIK             | 50  |
|                                 | *****;*****                                                   |     |
| SilA <i>Morganella morganii</i> | TSYPGQAPQIVENQVTYPLTTTMLSVPGAKTVRGFSQFGDSYVYVIFEDG            | 100 |
| CusA <i>Escherichia coli</i>    | TSYPGQAPQIVENQVTYPLTTTMLSVPGAKTVRGFSQFGDSYVYVIFEDG            | 100 |
|                                 | *****                                                         |     |
| SilA <i>Morganella morganii</i> | TDLYWARSRVLEYLNQVQGKLPAGVSSEIGPDATGVGWIFEYALVDRSGK            | 150 |
| CusA <i>Escherichia coli</i>    | TDPLYWARSRVLEYLNQVQGKLPAGVSAELGPDATGVGWIYEYALVDRSGK           | 150 |
|                                 | ** *****;*****;*****                                          |     |
| SilA <i>Morganella morganii</i> | HDLSSELRLQDWFLKPELKTIPNVAEVASVGGVVKQYQIQVNPVKLSQYG            | 200 |
| CusA <i>Escherichia coli</i>    | HDLADLRSLQDWFLKYELKTIPDVAEVASVGGVVKYQVVIDPQRLAQYG             | 200 |
|                                 | ***;*****;*****;*****;***;*:***;***                           |     |
| SilA <i>Morganella morganii</i> | ISLPEVKQALESSNQEAGGSSVEMAEYMVRASGYLQSIDDFNNIVLKT              | 250 |
| CusA <i>Escherichia coli</i>    | ISLAEVKSA LDASNQEAGGSSIELAEYMVRASGYLQTLDDFNHIVLKA             | 250 |
|                                 | ***_***_***_***_***_***_***_***_***_***_***_***_***_***_***_* |     |
| SilA <i>Morganella morganii</i> | GENGVPVYLRDVARVQTGPEMRR-----                                  | 273 |
| CusA <i>Escherichia coli</i>    | SENGVPVYLRDVAKVQIGPEMRRGIAELNGEGEVAG                          | 286 |
|                                 | _*****;** *****                                               |     |

Figure S1. Comparison of amino acid sequence of SilA from *M. morganii* to that of CusA from *E. coli*.

|                                 |                                                    |     |
|---------------------------------|----------------------------------------------------|-----|
| SilB <i>Morganella morganii</i> | MASLKIKYAAIISSLIAGGLISVTAWQYLNSSQKTQTEQKAPEKKVLF   | 50  |
| CusB <i>Escherichia coli</i>    | MASLKIKYAAIISSLIAGGLISVTAWQYLNSSQKTQTEQKAPEKKVLF   | 50  |
|                                 | *****                                              |     |
| SilB <i>Morganella morganii</i> | WYDPMKPDTKFDKPGKSPFMDMDLVPKYADESGDKSSGGIRIDPTQVQNL | 100 |
| CusB <i>Escherichia coli</i>    | WYDPMKPDTKFDKPGKSPFMDMDLVPKYADESGDKSSGGIRIDPTQVQNL | 100 |
|                                 | *****                                              |     |
| SilB <i>Morganella morganii</i> | GLKTQKVTRGMLNYSQTIPANVSYNEYQFVIVQARSDGFVEKVYPLTIGD | 150 |
| CusB <i>Escherichia coli</i>    | GLKTQKVTRGMLNYSQTIPANVSYNEYQFVIVQARSDGFVEKVYPLTIGD | 150 |
|                                 | *****                                              |     |
| SilB <i>Morganella morganii</i> | HVKKGTPOLIDITIPWVEAQSEFLLSGTGGETPQIKGVLERLRLAGMPE  | 200 |
| CusB <i>Escherichia coli</i>    | HVKKGTPOLIDITIPWVEAQSEFLLSGTGGETPQIKGVLERLRLAGMPE  | 200 |
|                                 | *****                                              |     |
| SilB <i>Morganella morganii</i> | EDIQRLRSTRTIQTRFTIKAPIDGVITAFDLRTGMNISKDKVVAQIQGMD | 250 |
| CusB <i>Escherichia coli</i>    | EDIQRLRSTRTIQTRFTIKAPIDGVITAFDLRTGMNISKDKVVAQIQGMD | 250 |
|                                 | *****                                              |     |
| SilB <i>Morganella morganii</i> | PVWISAAPVESIAYLLKDTSQFEISVPAYPDKTFHVEKWNILPSVDQTTR | 300 |
| CusB <i>Escherichia coli</i>    | PVWISAAPVESIAYLLKDTSQFEISVPAYPDKTFHVEKWNILPSVDQTTR | 300 |
|                                 | *****                                              |     |
| SilB <i>Morganella morganii</i> | TLQVRLQVSNKDEFLKPGMNAYLKLNTQSQEMLLIPSQAVIDTGKEQRVI | 350 |
| CusB <i>Escherichia coli</i>    | TLQVRLQVSNKDEFLKPGMNAYLKLNTQSQEMLLIPSQAVIDTGKEQRVI | 350 |
|                                 | *****                                              |     |
| SilB <i>Morganella morganii</i> | TVDDEGKFVPKQIHVLHESQQQSGIGSGLNEGDTVVVSGFLIDSEANIT  | 400 |
| CusB <i>Escherichia coli</i>    | TVDDEGKFVPKQIHVLHESQQQSGIGSGLNEGDTVVVSGFLIDSEANIT  | 400 |
|                                 | *****                                              |     |
| SilB <i>Morganella morganii</i> | GALERMRHPEKTENSMAMPAMSEQPVNMHSGH                   | 430 |
| CusB <i>Escherichia coli</i>    | GALERMRHPEKTENSMAMPAMSEQPVNMHSGH                   | 430 |
|                                 | *****                                              |     |

**Figure S2.** Comparison of amino acid sequence of SilB from *M. morganii* to that of CusB from *E. coli*.

|                                 |                                                       |     |
|---------------------------------|-------------------------------------------------------|-----|
| SilC <i>Morganella morganii</i> | MPKLLKLLSISTIFILAGCVSLAPFYQRPAPVPQQFSLSRNSLTPAVNGY    | 50  |
| CusC <i>Escherichia coli</i>    | MPKLLKLLSISTIFILAGCVSLAPFYQRPAPVPQQFSLSRNSLTPAVNGY    | 50  |
|                                 | *****                                                 |     |
| SilC <i>Morganella morganii</i> | QDTGWRNFFVDPQVTRLITEALTNNRDLRMAALKVEEARAQFNVTADADRY   | 100 |
| CusC <i>Escherichia coli</i>    | QDTGWRNFFVDPQVTRLITEALTNNRDLRMAALKVEEARAQFNVTADADRY   | 100 |
|                                 | *****                                                 |     |
| SilC <i>Morganella morganii</i> | PQLNASSGITYSGGLKGDKPTTQEYDAGLEFSYELDFFGKLNMSDADRQ     | 150 |
| CusC <i>Escherichia coli</i>    | PQLNASSGITYSGGLKGDKPTTQEYDAGLEFSYELDFFGKLNMSDADRQ     | 150 |
|                                 | *****                                                 |     |
| SilC <i>Morganella morganii</i> | NYFASEEARRAVRILLVSNVSQSYFSQQLAYEQLRIARETLKNYQQSYAF    | 200 |
| CusC <i>Escherichia coli</i>    | NYFASEEARRAVHILLVSSVSQSYFSQQLAYEQLRIARETLKNYQQSYAF    | 200 |
|                                 | *****                                                 |     |
| SilC <i>Morganella morganii</i> | VEQQLVGTSTNVLALBQARGQIESTRAEIAKREGDLAHANNALQLVLGTY    | 250 |
| CusC <i>Escherichia coli</i>    | VEQQLVGTSTNVLALBQARGQIESTRAEIAKREGDLAKANNALQLVLGTY    | 250 |
|                                 | *****                                                 |     |
| SilC <i>Morganella morganii</i> | RALPSEKGM-----                                        | 259 |
| CusC <i>Escherichia coli</i>    | RALPSEKGMKGGBIAPVKLPPLSSQILQRPDIMEABYQLKAADANIGA      | 300 |
|                                 | *****                                                 |     |
| SilC <i>Morganella morganii</i> | -----                                                 |     |
| CusC <i>Escherichia coli</i>    | ARAAFFPSITLTSGLSASSTELSSLFTSGSGMWNFIPKIEIPFNAGRNK     | 350 |
|                                 |                                                       |     |
| SilC <i>Morganella morganii</i> | -----                                                 |     |
| CusC <i>Escherichia coli</i>    | ANLKLAEIRQQQS VVNYESQKIQSAFKDVSDTLALRLDLSLQQLESQQRYLD | 400 |
|                                 |                                                       |     |
| SilC <i>Morganella morganii</i> | -----                                                 |     |
| CusC <i>Escherichia coli</i>    | SLQITLQRARGLYASGAVSYIEVLDAERSLPATQQTILDLTYSRQVNEIN    | 450 |
|                                 |                                                       |     |
| SilC <i>Morganella morganii</i> | -----                                                 |     |
| CusC <i>Escherichia coli</i>    | LPTALGGGWVE                                           | 461 |

Figure S3. Comparison of amino acid sequence of SilC from *M. morganii* to that of CusC from *E. coli*.

|                                        |                                                      |     |
|----------------------------------------|------------------------------------------------------|-----|
| SilP <i>Morganella morganii</i>        | MKNDNAVQHNNQTASEQTLSPDEGHVLRKVRDPVCGMAILPDRAHSSIRY   | 50  |
| P-type ATPases <i>Escherichia coli</i> | MKNDNAVQHNNQTASEQTLSPDEGHVLRKVRDPVCGMAILPDRAHSSIRY   | 50  |
|                                        | *****;*****                                          |     |
| SilP <i>Morganella morganii</i>        | QDHQLYFCSASCESKFKAHPDRYLTEDASEHSHHHHHHDHHEVSPDQIKQP  | 100 |
| P-type ATPases <i>Escherichia coli</i> | QDHQLYFCSASCESKFKAHPDRYLTEDASEHSHHHHHHDHHEVSPDQIKQP  | 100 |
|                                        | *****                                                |     |
| SilP <i>Morganella morganii</i>        | HHQAEKENSEGVWTCPMHPEIRRSGPSVCGMALEPLVATASTGPSDE      | 150 |
| P-type ATPases <i>Escherichia coli</i> | HHQAEKENSEGVWTCPMHPEIRRSGPSVCGMALEPLVATASTGPSDE      | 150 |
|                                        | *****                                                |     |
| SilP <i>Morganella morganii</i>        | LHDMTRRFWLGLLLAFPVLVLEMGSHLFPELRNTVPPQYNTWLQLLLASP   | 200 |
| P-type ATPases <i>Escherichia coli</i> | LHDMTRRFWLGLLLAFPVLVLEMGSHLFPELRNTVPPQYNTWLQLLLASP   | 200 |
|                                        | *****;*****                                          |     |
| SilP <i>Morganella morganii</i>        | VVLWCGWPFFARAGMSLRNRSLSNMFTP-----                    | 227 |
| P-type ATPases <i>Escherichia coli</i> | VVLWCGWPFFARAGMSLRNRSLSNMFTLVAMGTGVAVVYSVIATVFPSSWFP | 250 |
|                                        | *****                                                |     |
| SilP <i>Morganella morganii</i>        | -----                                                |     |
| P-type ATPases <i>Escherichia coli</i> | ASFRNMDGLVAVYFEAAAVITVLVLLGQVLELRAREQTSGAITALLNLAP   | 300 |

**Figure S4.** Comparison of amino acid sequence of SilP from *M. morganii* to that of P-type ATPases from *E. coli*.

|                                 |                                                      |     |
|---------------------------------|------------------------------------------------------|-----|
| SiIR <i>Morganella morganii</i> | MKILIVEDEIKTGEYLSKGLTEAGFVVDHADNGLTGHYLAMTA EYDLVIL  | 50  |
| CusR <i>Escherichia coli</i>    | MKLLIVEDEKKTGEYLTGKLT EAGFVVDLADNGLNGYHLMATG DYDLIIL | 50  |
|                                 | **:*:***** *:*****:***** *****.*****.:***:**         |     |
| SiIR <i>Morganella morganii</i> | DIMLPDVNGWDIIRMLRSAGKMPVLLLTALGTIEHRVKGLELGADDYLV    | 100 |
| CusR <i>Escherichia coli</i>    | DIMLPDVNGWDIVRMLRSANKGPILLLTALGTIEHRVKGLELGADDYLV    | 100 |
|                                 | *****:*****.*****:*****                              |     |
| SiIR <i>Morganella morganii</i> | KPF AFAELLARVRTLLRRGNTMITESQLKVADLSVDLVSRKVS RAGNRIV | 150 |
| CusR <i>Escherichia coli</i>    | KPF AFAELLARVRTLLRRGA VIESQFQVADLMVDLVSRKVTRSGTRIT   | 150 |
|                                 | *****:*****:***** *****:***.***.                     |     |
| SiIR <i>Morganella morganii</i> | LTSKEFSLLEFFIRHQGEVLPRSLIASQVWDM SFDSDTNAIDVAVKRLRA  | 200 |
| CusR <i>Escherichia coli</i>    | LTSKEFTLLEFFLRHQGEVLPRSLIASQVWDMN FSDSDTNAIDVAVKRLRG | 200 |
|                                 | *****:*****:*****.*****.                             |     |
| SiIR <i>Morganella morganii</i> | KIDNDYGTKLIQTVRGVGYMLEIPDA-                          | 226 |
| CusR <i>Escherichia coli</i>    | KIDNDFEPKLIQTVRGVGYMLEVPDQG                          | 227 |
|                                 | *****:*****:*****.                                   |     |

**Figure S5.** Comparison of amino acid sequence of SilR from *M. morganii* to that of CusR from *E. coli*.

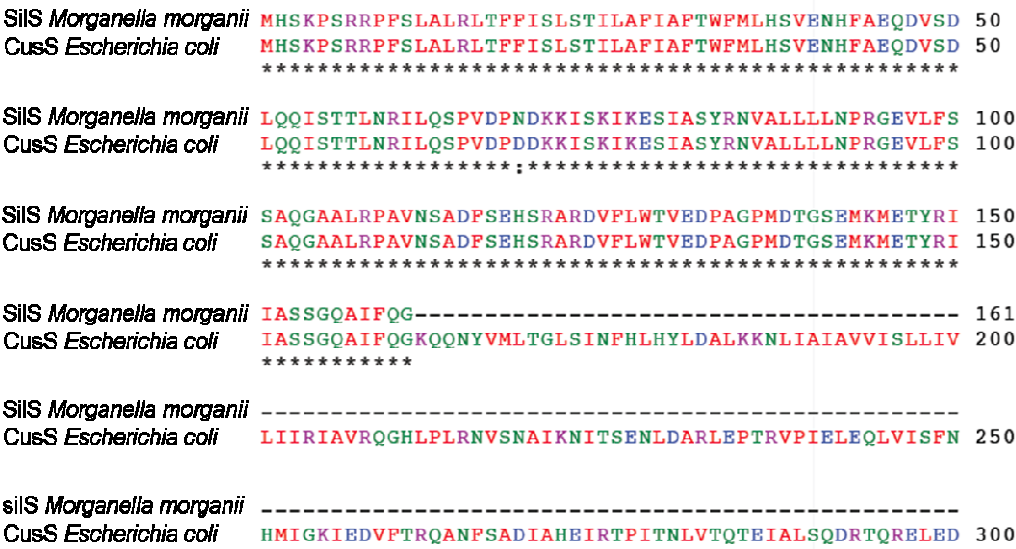

**Figure S6.** Comparison of amino acid sequence of SilS from *M. morganii* to that of CusS from *E. coli*.

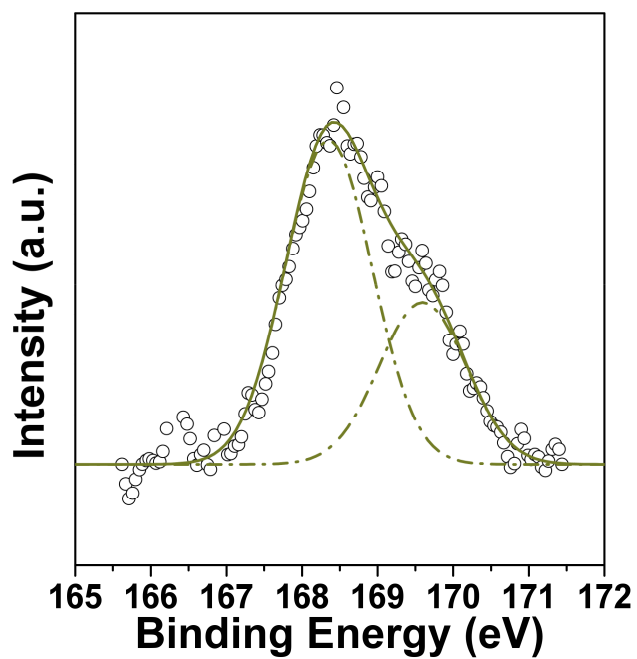

**Figure S7.** XPS spectra showing S 2p core level binding energy arising from CuNPs biosynthesized using *M. morganii*.
